# Supplementary material for: CAR T-Cell Persistence Correlates with Improved Outcome in Patients with B-Cell Lymphoma
Source: MDPI journal article supplement (doi:10.3390/ijms24065688), 2023-03-16
Supplement: s1 [file s1]

# **CAR T-Cell Persistence Correlates with Improved Outcome in Patients with B-Cell Lymphoma**

## **Original Study**

Valerie Wittibschlager <sup>1</sup>, Ulrike Bacher <sup>2</sup>, Katja Seipel <sup>1</sup>, Naomi Porret <sup>2</sup>, Gertrud Wiedemann <sup>2</sup>, Claudia Haslebacher <sup>1</sup>, Michèle Hoffmann <sup>1</sup>, Michael Daskalakis <sup>2</sup>, Dilara Akhoundova<sup>1†</sup>, Thomas Pabst <sup>1,\* †</sup>

<sup>†</sup>equal contribution

**Affiliations:** <sup>1</sup> Department of Medical Oncology; <sup>2</sup> Department of Hematology and Central Hematology Laboratory; Inselspital, University Hospital and University of Bern; Bern; Switzerland.

## Supplemental Tables

**Supplemental Table S1:** Baseline clinical characteristics of patients included in the study stratified by received CAR T-cell product.

| Parameter                                                                | Kymriah        |                            |                            |         | Yescarta/Tecartus         |                            |                            |              |
|--------------------------------------------------------------------------|----------------|----------------------------|----------------------------|---------|---------------------------|----------------------------|----------------------------|--------------|
|                                                                          | Total Kymriah® | ddPCR-negative at 6 months | ddPCR-positive at 6 months | P-value | Total Yescarta®/Tecartus® | ddPCR-negative at 6 months | ddPCR-positive at 6 months | P-value      |
| <b>Patients</b>                                                          | 55 (100%)      | 2 (4%)                     | 53 (96%)                   | >0.9999 | 37 (100%)                 | 13 (35%)                   | 24 (65%)                   | >0.9999      |
| <b>Demographic characteristics</b>                                       |                |                            |                            |         |                           |                            |                            |              |
| <b>Male/Female</b>                                                       | 33/22 (60/40%) | 1/1 (50/50%)               | 32/21 (60/40%)             | >0.9999 | 23/14 (62/38%)            | 8/5 (62/38%)               | 15/9 (63/37%)              | >0.9999      |
| <b>Median age at diagnosis, years (range)</b>                            | 62 (37-79)     | 62.5 (62-63)               | 62 (37-79)                 | 0.979   | 62 (36-80)                | 60 (42-80)                 | 63.5 (36-78)               | 0.6529       |
| <b>Diagnosis</b>                                                         |                |                            |                            |         |                           |                            |                            |              |
| <b>DLBCL</b>                                                             | 53 (96%)       | 2 (100%)                   | 51 (96%)                   | >0.9999 | 25 (68%)                  | 11 (85%)                   | 14 (58%)                   | 0.1491       |
| Primary ( <i>de novo</i> ) DLBCL                                         | 36 (65%)       | 1 (50%)                    | 35 (66%)                   | 0.5428  | 16 (43%)                  | 5 (38%)                    | 11 (46%)                   | 0.1153       |
| Secondary DLBCL, transformed from                                        | 17 (31%)       | 1 (50%)                    | 16 (30%)                   | 0.5428  | 9 (24%)                   | 6 (46%)                    | 3 (13%)                    | 0.1153       |
| Follicular lymphoma                                                      | 12 (22%)       | 1 (50%)                    | 11 (21%)                   | >0.9999 | 6 (16%)                   | 4 (31%)                    | 2 (8%)                     | >0.9999      |
| CLL/SLL                                                                  | 3 (5%)         | 0 (0%)                     | 3 (6%)                     | >0.9999 | 2 (5%)                    | 1 (8%)                     | 1 (4%)                     | >0.9999      |
| MZL                                                                      | 2 (4%)         | 0 (0%)                     | 2 (4%)                     | >0.9999 | 1 (3%)                    | 1 (8%)                     | 0 (0%)                     | >0.9999      |
| Follicular lymphoma                                                      | 2 (4%)         | 0 (0%)                     | 2 (4%)                     | >0.9999 | 0 (0%)                    | 0 (0%)                     | 0 (0%)                     | >0.9999      |
| Mantle cell lymphoma                                                     | 0 (0%)         | 0 (0%)                     | 0 (0%)                     | >0.9999 | 12 (32%)                  | 2 (15%)                    | 10 (42%)                   | 0.1491       |
| <b>Initial lymphoma stage</b>                                            |                |                            |                            |         |                           |                            |                            |              |
| I                                                                        | 1 (2%)         | 0 (0%)                     | 1 (2%)                     | >0.9999 | 0 (0%)                    | 0 (0%)                     | 0 (0%)                     | >0.9999      |
| II                                                                       | 12 (22%)       | 1 (50%)                    | 11 (21%)                   | 0.3919  | 8 (22%)                   | 1 (8%)                     | 7 (29%)                    | 0.2164       |
| III                                                                      | 4 (7%)         | 0 (0%)                     | 4 (8%)                     | >0.9999 | 5 (14%)                   | 5 (38%)                    | 0 (0%)                     | <b>0.003</b> |
| IV                                                                       | 26 (47%)       | 1 (50%)                    | 25 (47%)                   | >0.9999 | 17 (46%)                  | 5 (38%)                    | 12 (50%)                   | 0.7307       |
| Unknown                                                                  | 12 (22%)       | 0 (0%)                     | 12 (23%)                   | >0.9999 | 7 (19%)                   | 2 (15%)                    | 5 (17%)                    | >0.9999      |
| <b>IPI score (DLBCL)</b>                                                 |                |                            |                            |         |                           |                            |                            |              |
| 2                                                                        | 5 (9%)         | 0 (0%)                     | 5 (9%)                     | >0.9999 | 0 (0%)                    | 0 (0%)                     | 0 (0%)                     | >0.9999      |
| 3                                                                        | 19 (35%)       | 1 (50%)                    | 18 (34%)                   | >0.9999 | 12 (32%)                  | 6 (46%)                    | 6 (25%)                    | 0.2738       |
| 4 or 5                                                                   | 21 (38%)       | 1 (50%)                    | 20 (38%)                   | >0.9999 | 8 (22%)                   | 3 (23%)                    | 5 (17%)                    | >0.9999      |
| unknown                                                                  | 8 (15%)        | 0 (0%)                     | 8 (15%)                    | >0.9999 | 5 (14%)                   | 2 (15%)                    | 3 (13%)                    | >0.9999      |
| <b>MIPI (Mantle cell lymphoma)</b>                                       |                |                            |                            |         |                           |                            |                            |              |
| 4 to 5                                                                   | 0 (0%)         | 0 (0%)                     | 0 (0%)                     | >0.9999 | 5 (14%)                   | 1 (8%)                     | 4 (17%)                    | 0.6378       |
| 7                                                                        | 0 (0%)         | 0 (0%)                     | 0 (0%)                     | >0.9999 | 2 (5%)                    | 0 (0%)                     | 2 (8%)                     | 0.5315       |
| 9                                                                        | 0 (0%)         | 0 (0%)                     | 0 (0%)                     | >0.9999 | 1 (3%)                    | 1 (8%)                     | 0 (0%)                     | 0.3514       |
| Unknown                                                                  | 0 (0%)         | 0 (0%)                     | 0 (0%)                     | >0.9999 | 4 (11%)                   | 0 (0%)                     | 4 (17%)                    | 0.2756       |
| <b>Hematopoietic stem cell transplantation before CAR-T cell therapy</b> |                |                            |                            |         |                           |                            |                            |              |
| Autologous SCT                                                           | 26 (47%)       | 1 (50%)                    | 25 (47%)                   | >0.9999 | 18 (49%)                  | 8 (62%)                    | 10 (42%)                   | 0.3133       |
| Allogeneic SCT                                                           | 0 (0%)         | 0 (0%)                     | 0 (0%)                     | >0.9999 | 0 (0%)                    | 0 (0%)                     | 0 (0%)                     | >0.9999      |

CLL: chronic lymphocytic leukaemia; DLBCL: diffuse large B-cell lymphoma; IPI: International Prognostic Index; MIPI: Mantle cell International Prognostic Index; MZL: marginal zone lymphoma; SCT: stem cell transplantation ; SLL: small lymphocytic lymphoma

**Supplemental Table S2:** Details of CAR T-cell treatment and immune-related adverse events for patients treated with Kymriah® vs. Yescarta®/Tecartus®.

| Parameter                                                                    | Kymriah®                      |                                     |                                       |         | Yescarta/Tecartus®                       |                                       |                                       |               |
|------------------------------------------------------------------------------|-------------------------------|-------------------------------------|---------------------------------------|---------|------------------------------------------|---------------------------------------|---------------------------------------|---------------|
|                                                                              | Total Kymriah®<br>n=55 (100%) | ddPCR-negative at 6 months n=2 (4%) | ddPCR-positive at 6 months n=53 (96%) | P-value | Total Yescarta®/Tecartus®<br>n=37 (100%) | ddPCR-negative at 6 months n=13 (35%) | ddPCR-positive at 6 months n=24 (65%) | P-value       |
| Median age at CAR T-cell therapy (range)                                     | 69 (38-82)                    | 70.5 (69-72)                        | 67 (38-82)                            | 0.5418  | 64 (37-79)                               | 64 (44-75)                            | 70 (37-79)                            | 0.675         |
| <b>Number of treatment lines before CAR T-cell therapy</b>                   |                               |                                     |                                       |         |                                          |                                       |                                       |               |
| 1                                                                            | 0 (0%)                        | 0 (0%)                              | 0 (0%)                                | >0.9999 | 0 (0%)                                   | 0 (0%)                                | 0 (0%)                                | >0.9999       |
| 2                                                                            | 20 (37%)                      | 0 (0%)                              | 20 (38%)                              | 0.5286  | 10 (27%)                                 | 2 (15%)                               | 8 (33%)                               | 0.4395        |
| 3                                                                            | 26 (47%)                      | 2 (100%)                            | 24 (45%)                              | 0.2189  | 12 (32%)                                 | 7 (54%)                               | 5 (21%)                               | 0.0666        |
| More than 3                                                                  | 9 (16%)                       | 0 (0%)                              | 9 (17%)                               | >0.9999 | 15 (41%)                                 | 4 (31%)                               | 11 (46%)                              | 0.4908        |
| Previous radiotherapy, yes                                                   | 17 (31%)                      | 1 (50%)                             | 16 (30%)                              | 0.5266  | 12 (32%)                                 | 3 (23%)                               | 9 (38%)                               | 0.4757        |
| <b>Remission status before CAR T-cell therapy</b>                            |                               |                                     |                                       |         |                                          |                                       |                                       |               |
| CR                                                                           | 3 (5%)                        | 0 (0%)                              | 3 (6%)                                | >0.9999 | 2 (5%)                                   | 1 (8%)                                | 1 (4%)                                | >0.9999       |
| PR                                                                           | 24 (44%)                      | 2 (100%)                            | 22 (42%)                              | 0.1859  | 10 (27%)                                 | 2 (15%)                               | 8 (33%)                               | 0.4395        |
| SD                                                                           | 3 (5%)                        | 0 (0%)                              | 3 (6%)                                | >0.9999 | 1 (3%)                                   | 1 (8%)                                | 0 (0%)                                | 0.3514        |
| PD                                                                           | 25 (45%)                      | 0 (0%)                              | 25 (47%)                              | 0.4949  | 24 (65%)                                 | 9 (69%)                               | 15 (63%)                              | 0.7343        |
| Bridging therapy, yes                                                        | 33 (60%)                      | 1 (50%)                             | 32 (60%)                              | >0.9999 | 15 (41%)                                 | 8 (62%)                               | 7 (29%)                               | 0.0829        |
| Median LDH before lymphodepleting chemotherapy (U/l)                         | 370 (145-3949)                | 353.5 (249-458)                     | 370 (145-3949)                        | 0.8047  | 257 (126-982)                            | 295 (134-709)                         | 217 (126-982)                         | 0.5242        |
| Median duration between lymphapheresis and CAR T-cell infusion, days (range) | 60 (31-217)                   | 66.5 (49-84)                        | 60 (31-217)                           | >0.9999 | 40 (27-221)                              | 41 (34-221)                           | 38.5 (27-59)                          | 0.4964        |
| Median duration of hospitalization, days (range)                             | 21 (5-51)                     | 19.5 (19-20)                        | 21 (5-51)                             | 0.2411  | 25 (17-73)                               | 22 (18-42)                            | 27.5 (17-73)                          | 0.0578        |
| Cytokine-release syndrome (CRS)                                              | 45 (82%)                      | 2 (100%)                            | 43 (81%)                              | >0.9999 | 28 (76%)                                 | 10 (77%)                              | 18 (75%)                              | >0.9999       |
| Grade 1                                                                      | 27 (49%)                      | 2 (100%)                            | 25 (47%)                              | 0.2364  | 18 (49%)                                 | 7 (54%)                               | 11 (46%)                              | 0.7374        |
| Grade 2                                                                      | 16 (29%)                      | 0 (0%)                              | 16 (30%)                              | >0.9999 | 9 (24%)                                  | 2 (15%)                               | 7 (29%)                               | 0.4463        |
| Grade 3                                                                      | 2 (4%)                        | 0 (0%)                              | 2 (4%)                                | >0.9999 | 1 (3%)                                   | 1 (8%)                                | 0 (0%)                                | 0.3514        |
| Grade 4                                                                      | 0 (0%)                        | 0 (0%)                              | 0 (0%)                                | >0.9999 | 0 (0%)                                   | 0 (0%)                                | 0 (0%)                                | >0.9999       |
| Immune effector cell-associated neurotoxicity syndrome (ICANS)               | 17 (31%)                      | 0 (0%)                              | 17 (32%)                              | >0.9999 | 13 (35%)                                 | 1 (8%)                                | 12 (50%)                              | <b>0.0129</b> |
| Grade 1                                                                      | 4 (7%)                        | 0 (0%)                              | 4 (8%)                                | >0.9999 | 4 (11%)                                  | 0 (0%)                                | 4 (17%)                               | 0.2756        |
| Grade 2                                                                      | 6 (11%)                       | 0 (0%)                              | 6 (11%)                               | >0.9999 | 1 (3%)                                   | 0 (0%)                                | 1 (4%)                                | >0.9999       |
| Grade 3                                                                      | 4 (7%)                        | 0 (0%)                              | 4 (8%)                                | >0.9999 | 6 (16%)                                  | 1 (8%)                                | 5 (21%)                               | 0.3945        |
| Grade 4                                                                      | 3 (6%)                        | 0 (0%)                              | 3 (6%)                                | >0.9999 | 2 (5%)                                   | 0 (0%)                                | 2 (8%)                                | 0.5315        |
| Use of tocilizumab                                                           | 33 (60%)                      | 0 (0%)                              | 33 (62%)                              | 0.1556  | 26 (70%)                                 | 8 (62%)                               | 18 (75%)                              | 0.4645        |
| Use of steroids                                                              | 26 (47%)                      | 0 (0%)                              | 26 (49%)                              | 0.4923  | 22 (59%)                                 | 5 (38%)                               | 17 (71%)                              | 0.0829        |

CR: complete remission; LDH: lactate dehydrogenase; PD: progressive disease; PR: partial remission; SD: stable disease

**Supplemental Table S3:** Clinical outcome after CAR T-cell therapy for patients treated with Kymriah® vs. Yescarta®/Tecartus®

| Parameter                                      | Kymriah®                      |                                     |                                       |               | Yescarta®/Tecartus®                      |                                       |                                       |               |
|------------------------------------------------|-------------------------------|-------------------------------------|---------------------------------------|---------------|------------------------------------------|---------------------------------------|---------------------------------------|---------------|
|                                                | Total Kymriah®<br>n=55 (100%) | ddPCR-negative at 6 months n=2 (4%) | ddPCR-positive at 6 months n=53 (96%) | P-value       | Total Yescarta®/Tecartus®<br>n=37 (100%) | ddPCR-negative at 6 months n=13 (35%) | ddPCR-positive at 6 months n=24 (65%) | P-value       |
| <b>Best response</b>                           |                               |                                     |                                       |               |                                          |                                       |                                       |               |
| CR                                             | 27 (49%)                      | 1 (50%)                             | 26 (49%)                              | >0.9999       | 20 (54%)                                 | 7 (54%)                               | 13 (54%)                              | >0.9999       |
| PR                                             | 14 (25%)                      | 1 (50%)                             | 13 (25%)                              | 0.4478        | 9 (24%)                                  | 4 (31%)                               | 5 (21%)                               | 0.711         |
| SD                                             | 4 (7%)                        | 0 (0%)                              | 4 (8%)                                | >0.9999       | 3 (8%)                                   | 1 (8%)                                | 2 (8%)                                | >0.9999       |
| PD                                             | 10 (18%)                      | 0 (0%)                              | 10 (19%)                              | >0.9999       | 5 (14%)                                  | 1 (8%)                                | 4 (17%)                               | 0.6378        |
| <b>Time to best response, months</b>           |                               |                                     |                                       |               |                                          |                                       |                                       |               |
| 0                                              | 16 (29%)                      | 0 (0%)                              | 16 (30%)                              | >0.9999       | 8 (22%)                                  | 2 (15%)                               | 6 (25%)                               | 0.6851        |
| 1                                              | 20 (36%)                      | 2 (100%)                            | 20 (38%)                              | 0.1556        | 9 (24%)                                  | 3 (23%)                               | 6 (25%)                               | >0.9999       |
| 3                                              | 9 (16%)                       | 0 (0%)                              | 9 (17%)                               | >0.9999       | 15 (41%)                                 | 7 (54%)                               | 8 (33%)                               | 0.3003        |
| 6                                              | 3 (5%)                        | 0 (0%)                              | 3 (6%)                                | >0.9999       | 3 (8%)                                   | 0 (0%)                                | 3 (13%)                               | 0.5382        |
| 12                                             | 2 (4%)                        | 0 (0%)                              | 2 (4%)                                | >0.9999       | 1 (3%)                                   | 0 (0%)                                | 1 (4%)                                | >0.9999       |
| 15                                             | 1 (2%)                        | 0 (0%)                              | 1 (2%)                                | >0.9999       | 0 (0%)                                   | 0 (0%)                                | 0 (0%)                                | >0.9999       |
| 18                                             | 0 (0%)                        | 0 (0%)                              | 0 (0%)                                | >0.9999       | 0 (0%)                                   | 0 (0%)                                | 0 (0%)                                | >0.9999       |
| 21                                             | 1 (2%)                        | 0 (0%)                              | 1 (2%)                                | >0.9999       | 0 (0%)                                   | 0 (0%)                                | 0 (0%)                                | >0.9999       |
| 24                                             | 0 (0%)                        | 0 (0%)                              | 0 (0%)                                | >0.9999       | 1 (3%)                                   | 1 (8%)                                | 0 (0%)                                | 0.3514        |
| 27                                             | 1 (2%)                        | 0 (0%)                              | 1 (2%)                                | >0.9999       | 0 (0%)                                   | 0 (0%)                                | 0 (0%)                                | >0.9999       |
| <b>Response at last follow-up</b>              |                               |                                     |                                       |               |                                          |                                       |                                       |               |
| CR                                             | 25 (45%)                      | 0 (0%)                              | 25 (47%)                              | 0.4949        | 17 (46%)                                 | 7 (54%)                               | 10 (42%)                              | 0.5119        |
| PR                                             | 10 (18%)                      | 0 (0%)                              | 10 (19%)                              | >0.9999       | 6 (16%)                                  | 2 (15%)                               | 4 (17%)                               | >0.9999       |
| SD                                             | 3 (5%)                        | 0 (0%)                              | 3 (6%)                                | >0.9999       | 3 (8%)                                   | 1 (8%)                                | 2 (8%)                                | >0.9999       |
| PD                                             | 17 (31%)                      | 2 (100%)                            | 15 (28%)                              | 0.0916        | 11 (30%)                                 | 3 (23%)                               | 8 (33%)                               | 0.7106        |
| Median follow-up, days (range)                 | 209 (3-1240)                  | 209.5 (209-210)                     | 174 (3-1240)                          | 0.9791        | 425 (19-1023)                            | 511 (40-271)                          | 398.5 (19-1023)                       | 0.4409        |
| Relapse                                        | 18 (33%)                      | 2 (100%)                            | 16 (30%)                              | 0.103         | 13 (35%)                                 | 7 (54%)                               | 6 (25%)                               | 0.1477        |
| Relapse treatment                              | 15 (27%)                      | 2 (100%)                            | 13 (25%)                              | 0.0707        | 11 (30%)                                 | 7 (54%)                               | 4 (17%)                               | <b>0.0275</b> |
| Systemic treatment                             | 12 (22%)                      | 2 (100%)                            | 10 (19%)                              | <b>0.0444</b> | 10 (27%)                                 | 7 (54%)                               | 3 (13%)                               | <b>0.0167</b> |
| Radiotherapy                                   | 8 (15%)                       | 1 (50%)                             | 7 (13%)                               | 0.2721        | 4 (11%)                                  | 2 (15%)                               | 2 (8%)                                | 0.6016        |
| Median time to relapse, days (range)           | 72.5 (14-863)                 | 81.5 (72-91)                        | 71 (14-863)                           | 0.7188        | 154.5 (11-536)                           | 183 (11-536)                          | 150 (12-347)                          | 0.6026        |
| Death                                          | 28 (51%)                      | 2 (100%)                            | 26 (49%)                              | 0.4909        | 14 (38%)                                 | 4 (31%)                               | 10 (42%)                              | 0.7245        |
| Cause of death is disease related              | 23 (42%)                      | 2 (100%)                            | 21 (40%)                              | 0.1704        | 12 (32%)                                 | 4 (31%)                               | 8 (33%)                               | >0.9999       |
| Cause of death is toxicity                     | 0 (0%)                        | 0 (0%)                              | 0 (0%)                                | >0.9999       | 1 (3%)                                   | 0 (0%)                                | 1 (4%)                                | >0.9999       |
| Cause of death is an infection                 | 2 (4%)                        | 0 (0%)                              | 2 (4%)                                | >0.9999       | 0 (0%)                                   | 0 (0%)                                | 0 (0%)                                | >0.9999       |
| Cause of death is a 2 <sup>nd</sup> malignancy | 1 (2%)                        | 0 (0%)                              | 1 (2%)                                | >0.9999       | 0 (0%)                                   | 0 (0%)                                | 0 (0%)                                | >0.9999       |
| Other cause                                    | 2 (4%)                        | 0 (0%)                              | 2 (4%)                                | >0.9999       | 1 (3%)                                   | 0 (0%)                                | 1 (4%)                                | >0.9999       |
| Median time to death, days (range)             | 71 (3-1110)                   | 209.5 (209-210)                     | 56.5 (3-1110)                         | 0.2513        | 113 (19-372)                             | 93 (40-201)                           | 135 (19-372)                          | 0.6354        |
